# Supplementary material for: Heterogeneity of CEACAM5 in breast cancer
Source: PubMed Central journal article supplement (PMC7597409; doi:10.18632/oncotarget.27778), 2020-10-27
Supplement: oncotarget-11-3886-s001.pdf [file oncotarget-11-3886-s001.pdf]

## Heterogeneity of CEACAM5 in breast cancer

### SUPPLEMENTARY MATERIALS

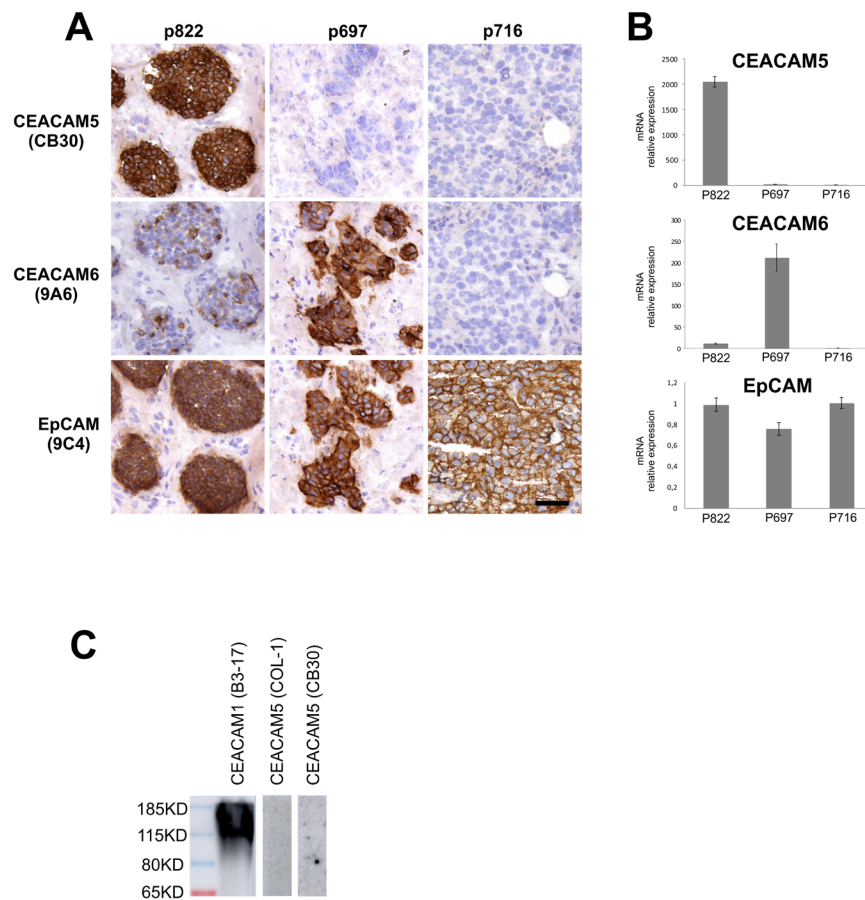

**Supplementary Figure 1: Immunohistochemical staining of three different breast carcinomas with CEACAM5 mAb CB30 and CEACAM6 mAb 9A6 correspond to expression levels of mRNA transcripts of *CEACAM5* and *CEACAM6*, respectively.** (A) Immunohistochemical staining of sections from three breast carcinomas utilizing CEACAM5-specific CB30, CEACAM6-specific 9A6 and EpCAM mAb 9C4. Bar, 50  $\mu$ m. (B) Corresponding expression of transcripts for *CEACAM5*, *CEACAM6* and *EpCAM*. (C) Western blot performed on lysate from HEK293 cells overexpressing human CEACAM1 demonstrating that CEACAM5 mAbs CB30 and COL-1 do not cross-react with CEACAM1. CEACAM1 mAb B3-17 was included as a positive control.

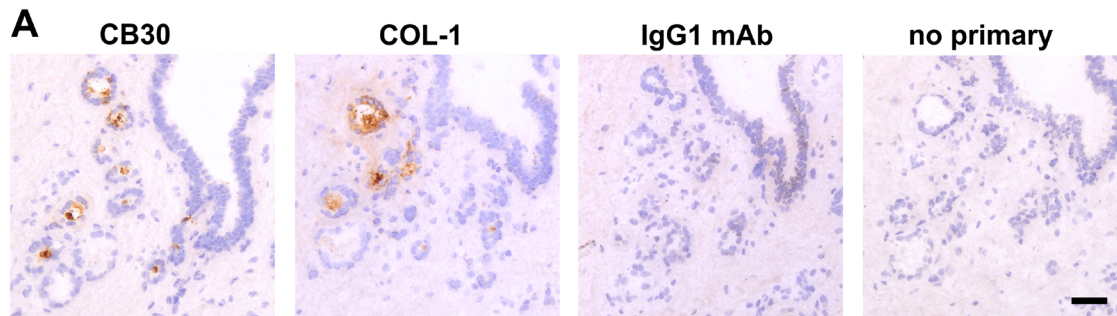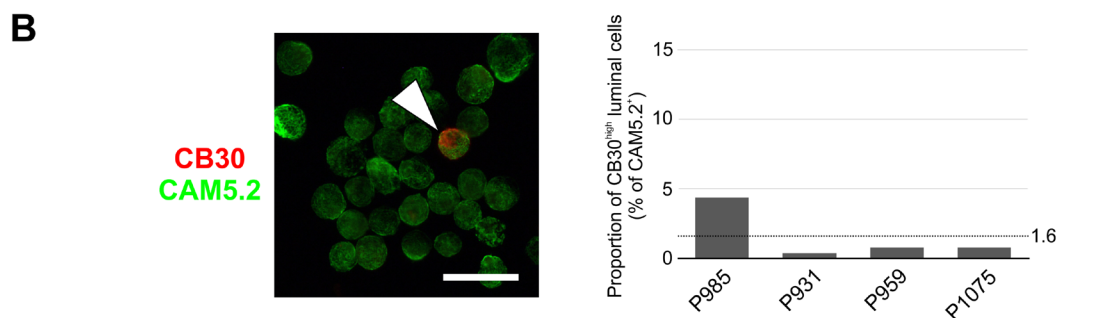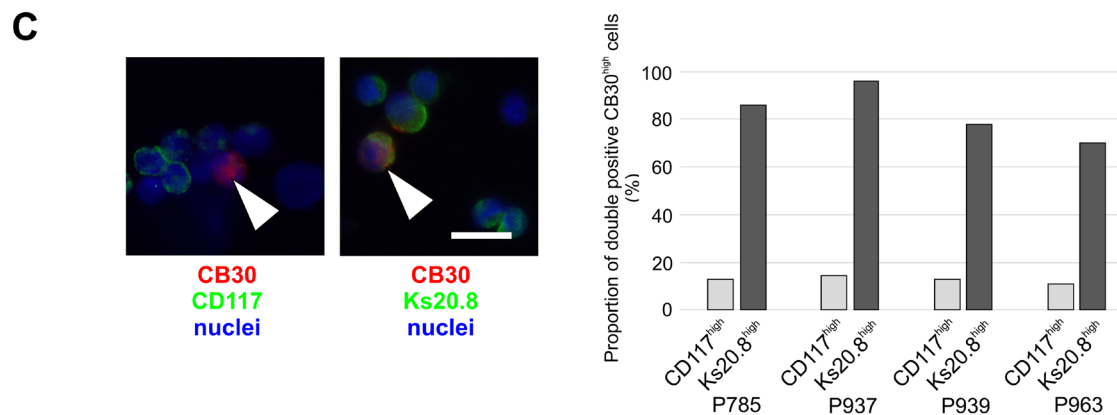

**Supplementary Figure 2: CEACAM5 is expressed by a small subset of mature luminal cells in the normal breast gland.** (A) Serial sections of normal breast stained by immunoperoxidase for CEACAM5 (CB30 and COL-1) as well as an unrelated mAb against PR and a control section with no primary antibody added. Bar, 50  $\mu$ m. (B) Immunofluorescent staining of smears of luminal cells for CEACAM5 (red) and luminal-specific marker CAM5.2 (green) in left panels. Arrowheads mark examples of CEACAM5-positive cells. Bar, 25  $\mu$ m. Right panel shows graphs of the proportion of CEACAM5-positive cells within the luminal compartment in four biopsies, averaging 1.6% for CEACAM5. For each biopsy, 500 CAM5.2 cells were evaluated. (C) Immunosmears doublestained for CEACAM5 (red) and progenitor marker CD117 (green) or mature luminal marker Ks20.8 (green) in left panel. Examples of CEACAM5-positive cells are marked by arrowheads. Bar, 20  $\mu$ m. Right panel shows the proportion of CEACAM5-positive cells within progenitor and mature luminal compartments in four biopsies. For each biopsy 200 cells were evaluated.

| No. | Paired tumor set | Primary tumor | L.N. metastasis |
|-----|------------------|---------------|-----------------|
| 1   | M29-1/M29-2      | -             | -               |
| 2   | M29-3/M29-4      | +/-           | +/-             |
| 3   | M29-5/M29-6      | -             | -               |
| 4   | P811/P812        | -/+           | -/+             |
| 5   | P835/P836        | -/+           | -/+             |
| 6   | P839/P840        | +/-           | +/-             |
| 7   | P842/P843♂       | -/+           | -               |
| 8   | P845/P846        | +/-           | +/-             |
| 9   | P856/P857        | +/-           | +/-             |
| 10  | P870/P871        | +/-           | +/-             |
| 11  | P942/P943        | -             | -               |

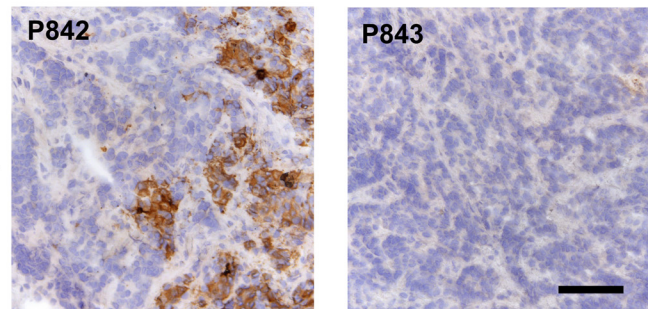

**Supplementary Figure 3: Results of immunohistochemical stainings of paired primary breast cancers and corresponding lymph node metastases.** Evaluation of 11 sets of cryosectioned breast tumors immunostained for CEACAM5. -: negative; -/+ : heterogeneously positive, < 50%; +/- : heterogeneously positive, > 50%. Tumor set marked with ♂ is from a male patient; the other pairs are from female patients. Right panel shows the CEACAM5 staining pattern of the male breast tumor set. Bar, 50  $\mu$ m.

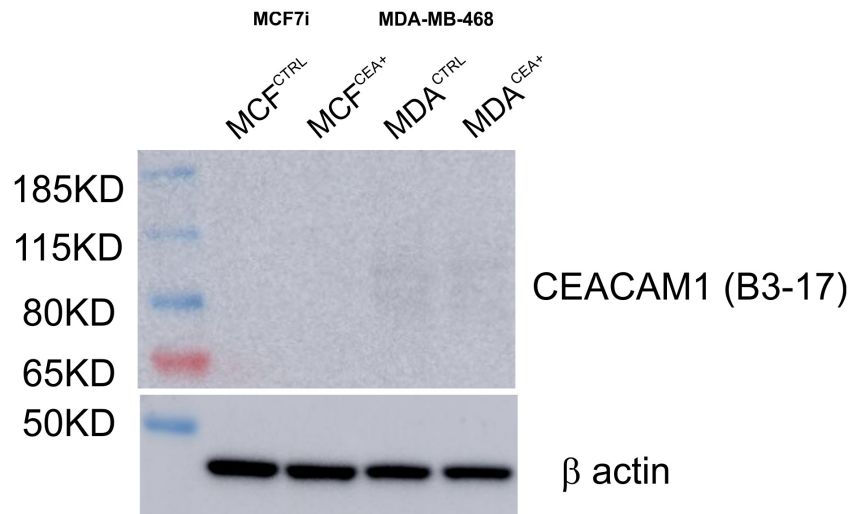

**Supplementary Figure 4: Western blot comparison of CEACAM1-expression in MCF7i and MDA-MB468 breast cancer control cells (CTRL) with ectopically CEACAM5-overexpressing sublines (CEA+) demonstrating that CEACAM1 is not induced in CEA+ cells.** MAb B-17 was used to analyze CEACAM1 expression while mAb AC-15 against  $\beta$  actin was included as loading control.

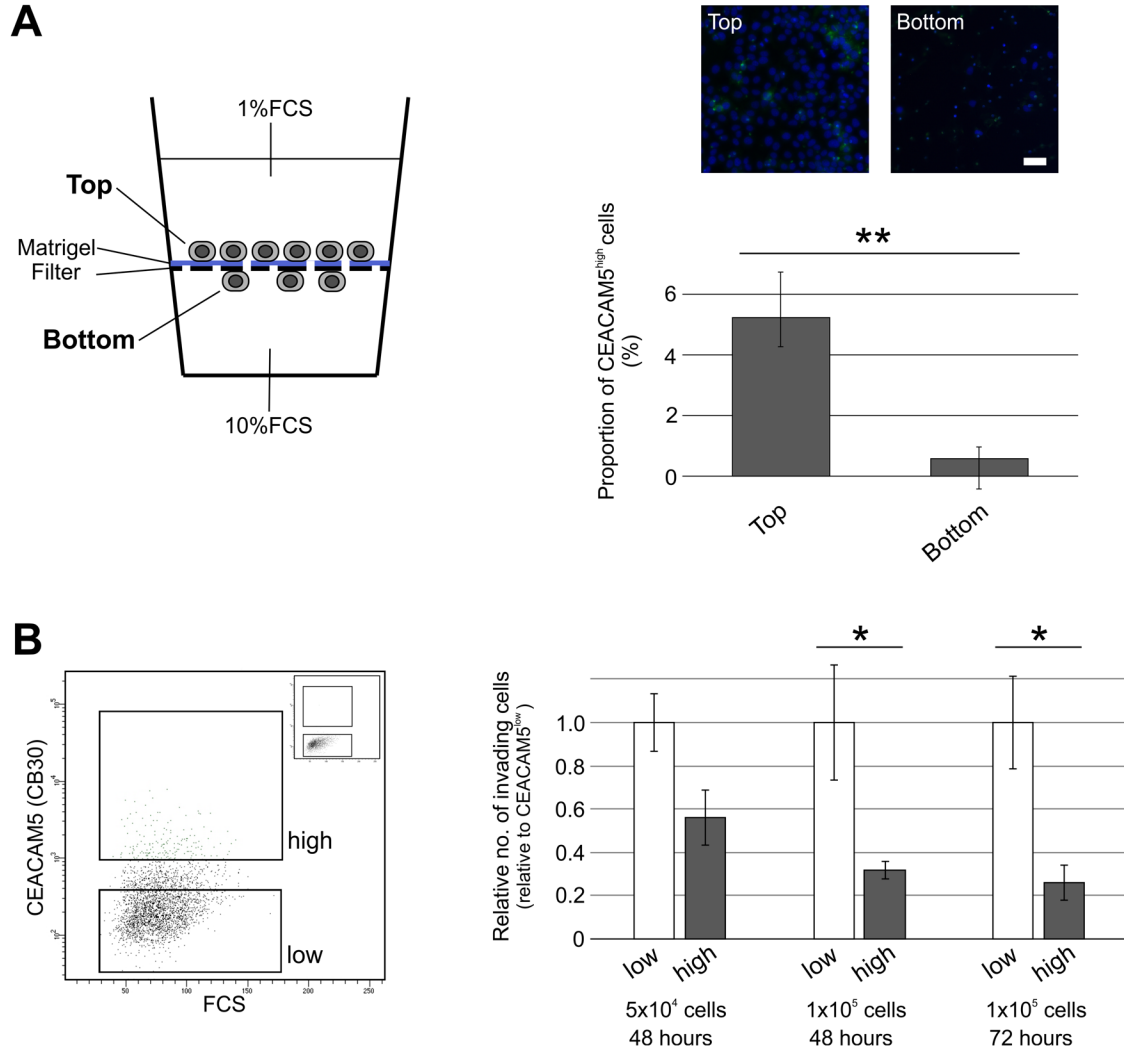

**Supplementary Figure 5: Transwell invasion assays demonstrate that CEACAM5-negative cells are more invasive than CEACAM5<sup>high</sup> cells.** (A) Left panel is a schematized drawing of the principle of the transwell invasion assay in which cells are placed on top of a filter with 8  $\mu$ m pores covered with a thin layer of Matrigel. The number of invading cells are assessed on the bottom side of the filters. The right panel shows the proportion of CEACAM5<sup>high</sup> MCF7i cells in the noninvading versus the invading population in transwell invasion assay. Bar, 50  $\mu$ m. (B) FACS-diagram of MCF7i cells gating for CEACAM5<sup>high</sup> and CEACAM5<sup>neg/low</sup> cells in left panel. Insert shows diagram of MCF7i cells with no primary antibody. Right panel shows graphs from three experiments comparing sorted CEACAM5<sup>high</sup> and <sup>neg/low</sup> cells in the transwell invasion assay. \* and \*\* indicate  $p < 0.05$  and  $p < 0.01$  tested by  $t$  test, respectively.

**Supplementary Table 1: Evaluation of 110 breast carcinomas stained by immunohistochemistry, divided into molecular profiles Luminal A, Luminal B, HER2-enriched and Triple-negative**

| Biopsy | CEA              | CEA            | CEA            | CEACAM6        |
|--------|------------------|----------------|----------------|----------------|
|        | CB30             | COL-1          | 1105           | 9A6            |
|        | <b>Luminal A</b> |                |                |                |
| P696   | + <sup>d</sup>   | + <sup>d</sup> | + <sup>d</sup> | + <sup>d</sup> |
| P701   | - <sub>b</sub>   | -              | + <sup>d</sup> | + <sup>d</sup> |
| P703   | -                | -              | -              | -              |
| P707   | - <sub>b</sub>   | - <sub>b</sub> | + <sup>d</sup> | + <sup>c</sup> |
| P720   | + <sup>c</sup>   | + <sup>c</sup> | + <sup>e</sup> | + <sup>e</sup> |
| P721-B | - <sub>b</sub>   | -              | + <sup>d</sup> | + <sup>d</sup> |
| P726-1 | + <sup>d</sup>   | + <sup>d</sup> | + <sup>d</sup> | + <sup>d</sup> |
| P760-1 | + <sup>c</sup>   | + <sup>c</sup> | + <sup>d</sup> | + <sup>c</sup> |
| P761   | + <sup>d</sup>   | + <sup>d</sup> | + <sup>e</sup> | + <sup>e</sup> |
| P775   | + <sup>c</sup>   | + <sup>c</sup> | + <sup>d</sup> | + <sup>d</sup> |
| P786   | + <sup>c</sup>   | + <sup>c</sup> | + <sup>d</sup> | + <sup>d</sup> |
| P787   | + <sup>c</sup>   | + <sup>c</sup> | + <sup>e</sup> | + <sup>e</sup> |
| P788   | + <sup>c</sup>   | + <sup>c</sup> | + <sup>e</sup> | + <sup>e</sup> |
| p822   | + <sup>c</sup>   | + <sup>c</sup> | + <sup>c</sup> | + <sup>d</sup> |
| P835*  | + <sup>d</sup>   | + <sup>d</sup> | + <sup>e</sup> | + <sup>d</sup> |
| P870*  | + <sup>e</sup>   | + <sup>e</sup> | + <sup>e</sup> | + <sup>e</sup> |
| P874   | + <sup>e</sup>   | + <sup>e</sup> | + <sup>e</sup> | + <sup>e</sup> |
| P875   | + <sup>d</sup>   | + <sup>d</sup> | + <sup>c</sup> | + <sup>c</sup> |
| P883   | -                | -              | -              | -              |
| P887   | + <sup>e</sup>   | + <sup>e</sup> | + <sup>e</sup> | + <sup>e</sup> |
| P891   | + <sup>d</sup>   | + <sup>d</sup> | + <sup>e</sup> | + <sup>c</sup> |
| P919   | + <sup>d</sup>   | + <sup>d</sup> | + <sup>c</sup> | + <sup>c</sup> |
| P929   | + <sup>d</sup>   | + <sup>e</sup> | + <sup>e</sup> | + <sup>e</sup> |
| P947   | -                | -              | + <sup>d</sup> | + <sup>d</sup> |
| P953   | + <sup>e</sup>   | + <sup>e</sup> | + <sup>e</sup> | + <sup>c</sup> |
| P989   | - <sub>b</sub>   | - <sub>b</sub> | + <sup>d</sup> | + <sup>c</sup> |
| P991   | + <sup>c</sup>   | + <sup>c</sup> | + <sup>c</sup> | -              |
| P1031  | -                | -              | -              | -              |
| P1033  | + <sup>c</sup>   | + <sup>c</sup> | + <sup>c</sup> | + <sup>c</sup> |
| P1035  | - <sub>b</sub>   | - <sub>b</sub> | + <sup>c</sup> | + <sup>c</sup> |
| P1036  | -                | -              | + <sup>e</sup> | + <sup>e</sup> |
| P1041  | + <sup>d</sup>   | + <sup>d</sup> | + <sup>e</sup> | + <sup>e</sup> |
| P1048  | -                | -              | -              | -              |
| P1051  | - <sub>b</sub>   | - <sub>b</sub> | + <sup>c</sup> | + <sup>c</sup> |
| P1054  | + <sup>c</sup>   | + <sup>c</sup> | + <sup>d</sup> | + <sup>d</sup> |
| P1059  | + <sup>d</sup>   | + <sup>d</sup> | + <sup>e</sup> | + <sup>d</sup> |
| P1061  | + <sup>c</sup>   | + <sup>c</sup> | + <sup>c</sup> | + <sup>c</sup> |
| P1062  | -                | -              | -              | -              |
| P1066  | + <sup>c</sup>   | + <sup>c</sup> | + <sup>e</sup> | + <sup>e</sup> |
| P1068  | + <sup>e</sup>   | + <sup>e</sup> | + <sup>e</sup> | + <sup>e</sup> |
| P1099  | + <sup>d</sup>   | + <sup>d</sup> | + <sup>d</sup> | - <sub>b</sub> |
| P1100  | + <sup>e</sup>   | + <sup>e</sup> | + <sup>e</sup> | + <sup>e</sup> |
| P1101  | -                | -              | + <sup>e</sup> | + <sup>e</sup> |
| P1102  | + <sup>d</sup>   | + <sup>d</sup> | + <sup>d</sup> | - <sub>b</sub> |
| P1103  | + <sup>c</sup>   | + <sup>c</sup> | + <sup>e</sup> | + <sup>d</sup> |
| P1105  | + <sup>d</sup>   | + <sup>d</sup> | + <sup>e</sup> | + <sup>d</sup> |

|       |                |                |                |                |
|-------|----------------|----------------|----------------|----------------|
| P1106 | + <sup>d</sup> | + <sup>d</sup> | + <sup>d</sup> | + <sup>d</sup> |
| P1111 | —              | —              | —              | —              |
| P1112 | + <sup>e</sup> | + <sup>e</sup> | + <sup>e</sup> | + <sup>e</sup> |
| Total | 34/49          | 34/49          | 43/49          | 40/49          |

**Luminal B**

|          |                |                |                |                |
|----------|----------------|----------------|----------------|----------------|
| w275-4   | + <sup>d</sup> | + <sup>d</sup> | + <sup>e</sup> | + <sup>d</sup> |
| w354-4   | + <sup>e</sup> | + <sup>e</sup> | + <sup>e</sup> | + <sup>e</sup> |
| P716     | —              | —              | —              | —              |
| P807     | + <sup>d</sup> | + <sup>d</sup> | + <sup>d</sup> | + <sup>d</sup> |
| P834-1   | + <sup>e</sup> | + <sup>e</sup> | + <sup>e</sup> | + <sup>d</sup> |
| P892     | + <sup>e</sup> | + <sup>e</sup> | + <sup>e</sup> | + <sup>e</sup> |
| P917     | + <sup>e</sup> | + <sup>e</sup> | + <sup>e</sup> | + <sup>e</sup> |
| P1040    | —              | —              | + <sup>d</sup> | + <sup>d</sup> |
| P1055    | —              | —              | — <sup>b</sup> | — <sup>b</sup> |
| P1063    | —              | —              | — <sup>b</sup> | —              |
| W3096-10 | + <sup>e</sup> | + <sup>e</sup> | + <sup>d</sup> | + <sup>d</sup> |
| Total    | 7/11           | 7/11           | 8/11           | 8/11           |

**HER2-enriched**

|         |                |                |                |                |
|---------|----------------|----------------|----------------|----------------|
| w164-1  | + <sup>e</sup> | + <sup>e</sup> | + <sup>e</sup> | + <sup>e</sup> |
| P736    | —              | —              | + <sup>e</sup> | + <sup>e</sup> |
| P764    | — <sup>b</sup> | — <sup>b</sup> | + <sup>e</sup> | + <sup>e</sup> |
| P811*   | + <sup>e</sup> | + <sup>e</sup> | + <sup>e</sup> | + <sup>e</sup> |
| P839*   | + <sup>e</sup> | + <sup>e</sup> | + <sup>e</sup> | + <sup>e</sup> |
| P886    | —              | —              | —              | —              |
| P888    | + <sup>e</sup> | + <sup>e</sup> | + <sup>e</sup> | + <sup>e</sup> |
| P897    | — <sup>b</sup> | — <sup>b</sup> | + <sup>e</sup> | + <sup>e</sup> |
| P901    | + <sup>e</sup> | + <sup>e</sup> | + <sup>e</sup> | + <sup>e</sup> |
| P907    | + <sup>d</sup> | + <sup>d</sup> | + <sup>e</sup> | + <sup>e</sup> |
| P918    | + <sup>d</sup> | + <sup>d</sup> | + <sup>e</sup> | + <sup>e</sup> |
| P950    | + <sup>d</sup> | + <sup>d</sup> | + <sup>e</sup> | + <sup>e</sup> |
| P1067   | + <sup>d</sup> | + <sup>d</sup> | + <sup>e</sup> | + <sup>d</sup> |
| W1872-2 | + <sup>e</sup> | + <sup>e</sup> | + <sup>e</sup> | + <sup>e</sup> |
| W1872-3 | + <sup>e</sup> | + <sup>e</sup> | + <sup>e</sup> | + <sup>e</sup> |
| W3175   | + <sup>d</sup> | + <sup>d</sup> | + <sup>d</sup> | + <sup>d</sup> |
| Total   | 12/16          | 12/16          | 15/16          | 15/16          |

**Triple-negative**

|        |                |                |                |                |
|--------|----------------|----------------|----------------|----------------|
| M29-5* | —              | —              | —              | —              |
| W117-1 | + <sup>d</sup> | + <sup>d</sup> | + <sup>e</sup> | + <sup>e</sup> |
| W190-1 | —              | —              | —              | —              |
| W355-2 | —              | —              | —              | —              |
| P687   | + <sup>d</sup> | + <sup>d</sup> | + <sup>d</sup> | + <sup>d</sup> |
| P697   | —              | —              | + <sup>e</sup> | + <sup>d</sup> |
| P709   | —              | —              | —              | —              |
| P757   | — <sup>b</sup> | — <sup>b</sup> | + <sup>d</sup> | + <sup>d</sup> |
| P766   | —              | —              | —              | —              |
| P783   | —              | —              | —              | —              |
| P853   | —              | —              | —              | —              |
| P860   | + <sup>e</sup> | + <sup>e</sup> | + <sup>e</sup> | + <sup>e</sup> |
| P873   | + <sup>e</sup> | + <sup>d</sup> | + <sup>e</sup> | + <sup>e</sup> |
| P905   | —              | —              | —              | —              |
| P909   | —              | —              | —              | —              |

|         |                |                |                |                |
|---------|----------------|----------------|----------------|----------------|
| P914    | -              | -              | -              | -              |
| P921    | -              | -              | -              | -              |
| P924    | -              | -              | + <sup>e</sup> | + <sup>e</sup> |
| P942*   | -              | -              | -              | -              |
| P949    | -              | -              | -              | -              |
| P1044   | + <sup>e</sup> | + <sup>e</sup> | + <sup>e</sup> | + <sup>e</sup> |
| P1049   | -              | -              | -              | -              |
| P1052   | -              | -              | -              | -              |
| P1056   | -              | -              | -              | -              |
| P1060   | -              | -              | -              | -              |
| P1065   | -              | -              | -              | -              |
| W1076-5 | -              | -              | -              | -              |
| P1104   | -              | -              | - <sup>b</sup> | - <sup>b</sup> |
| W1731-3 | + <sup>e</sup> | + <sup>e</sup> | + <sup>e</sup> | + <sup>e</sup> |
| W1884-1 | + <sup>d</sup> | + <sup>d</sup> | + <sup>d</sup> | + <sup>d</sup> |
| W1884-3 | -              | -              | -              | -              |
| W3096-9 | -              | -              | + <sup>c</sup> | + <sup>c</sup> |
| W3141-6 | + <sup>e</sup> | + <sup>d</sup> | + <sup>e</sup> | + <sup>e</sup> |
| W3147-1 | -              | -              | + <sup>d</sup> | + <sup>d</sup> |
| Total   | 8/34           | 8/34           | 13/34          | 13/34          |

Tumors were stained with antibodies against CEACAM5 (clones CB30 and COL-1), CEACAM5/6 (clone 1105) and CEACAM6 (clone 9A6). Tumors were considered negative when no (-) or < 1% positive neoplastic cells (-<sup>b</sup>) were detected. Positive tumors were subdivided into < 10% positive cells (+<sup>c</sup>), < 50% positive cells (+<sup>d</sup>) and > 50% positive cells (+<sup>e</sup>). Minor discrepancies between mAbs CB30 and COL-1 are marked in Bold. Tumors marked with \*were also included in the primary tumor and lymph node metastases set in Supplementary Figure 3.

**Supplementary Table 2: Relapse-free survival of breast cancer groups trichotomized into patients with CEACAM5<sup>low</sup> expression (T1) and CEACAM5<sup>high</sup> expression (T3)**

| Group                             | No. of patients in test |            |            | Relapse-free Survival |                         |
|-----------------------------------|-------------------------|------------|------------|-----------------------|-------------------------|
|                                   | Total                   | T1         | T3         | <i>P</i> value        | HR                      |
| All                               | 3951                    | 1310       | 1341       | 0.2874                | 0.93 (0.81–1.06)        |
| <b>ER-positive</b>                | <b>2061</b>             | <b>683</b> | <b>701</b> | <b>0.0023</b>         | <b>1.39 (1.12–1.71)</b> |
| ER-negative                       | 801                     | 264        | 272        | 0.9                   | 1.02 (0.77–1.35)        |
| Luminal A                         | 1933                    | 639        | 657        | 0.1958                | 1.15 (0.93–1.43)        |
| Luminal B                         | 1149                    | 379        | 391        | 0.5842                | 1.07 (0.85–1.34)        |
| HER2                              | 251                     | 83         | 85         | 0.628                 | 0.89 (0.55–1.43)        |
| <b>Basal-like*</b>                | <b>618</b>              | <b>208</b> | <b>209</b> | <b>0.025</b>          | <b>0.71 (0.53–0.96)</b> |
| <b>Basal-like 1*</b>              | <b>171</b>              | <b>56</b>  | <b>58</b>  | <b>0.0063</b>         | <b>0.44 (0.24–0.81)</b> |
| <b>Luminal androgen receptor*</b> | <b>203</b>              | <b>67</b>  | <b>69</b>  | <b>0.0116</b>         | <b>0.51 (0.3–0.87)</b>  |
| Mesenchymal*                      | 177                     | 59         | 60         | 0.0867                | 0.65 (0.39–1.07)        |
| Immunomodulatory*                 | 203                     | 67         | 69         | 0.5165                | 1.3 (0.58–2.92)         |
| Basal-like 2*                     | 76                      | 25         | 26         | 0.565                 | 0.77 (0.31–1.89)        |
| Mesenchymal stem-like*            | 63                      | 21         | 21         | 0.9312                | 1.05 (0.38–2.89)        |

Values were calculated at Kaplan-Meier Plotter (<https://kmplot.com>) utilizing JetSet best probe set 201884\_at with a follow up threshold set at 120 months. Statistically significant groups are highlighted in Bold. \*marks subsets that are considered subgroups of TN breast cancer.

**Supplementary Table 3: Overall survival of breast cancer groups trichotomized into patients with CEACAM5<sup>low</sup> expression (T1) and CEACAM5<sup>high</sup> expression (T3)**

| Group            | No. of patients in test |            |            | Overall survival |                         |
|------------------|-------------------------|------------|------------|------------------|-------------------------|
|                  | Total                   | T1         | T3         | <i>P</i> value   | HR                      |
| <b>All</b>       | <b>1402</b>             | <b>463</b> | <b>477</b> | <b>0.0192</b>    | <b>1.38 (1.05–1.8)</b>  |
| ER-positive      | 548                     | 181        | 186        | 0.0648           | 1.54 (0.97–2.45)        |
| ER-negative      | 251                     | 83         | 85         | 0.6411           | 1.14 (0.65–1.99)        |
| Luminal A        | 611                     | 203        | 206        | 0.293            | 1.27 (0.81–1.98)        |
| <b>Luminal B</b> | <b>433</b>              | <b>143</b> | <b>147</b> | <b>0.0013</b>    | <b>2.12 (1.33–3.38)</b> |
| HER2             | 117                     | 39         | 40         | 0.5103           | 0.75 (0.33–1.75)        |
| Basal-like       | 241                     | 80         | 81         | 0.43             | 1.27 (0.7–2.33)         |

Values were calculated at Kaplan-Meier Plotter (<https://kmplot.com>) utilizing JetSet best probe set 201884\_at with a follow up threshold set at 120 months. Statistically significant groups are highlighted in Bold.
